# Supplementary material
Source: PubMed Central journal article supplement (PMC9486048)
Supplement: mmc1.pdf [file mmc1.pdf]

**Supplemental information**

**CLN7/MFSD8 may be an important  
factor for SARS-CoV-2 cell entry**

**Elena-Sofia Heint, Sebastian Lorenz, Barbara Schmidt, Nouf Nasser M Laqtom, Joseph R. Mazzulli, Laetitia Francelle, Timothy W. Yu, Benjamin Greenberg, Stephan Storch, Ines Tegtmeier, Helga Othmen, Katja Maurer, Malin Steinfurth, Ralph Witzgall, Vladimir Milenkovic, Christian H. Wetzel, and Markus Reichold**

Figure S1: Genotyping of HEK293T CLN7 knockout cells, Related to STAR Methods

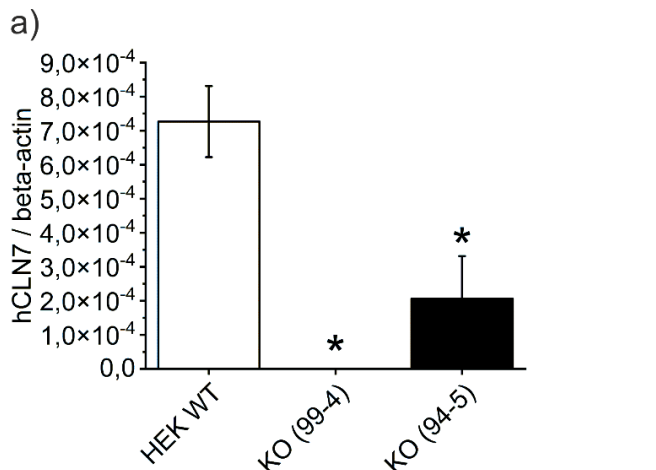

b)

**Line 94-5: Exon 11 (CLN7 genomic DNA NG\_008657.1)**

**WT:**  
 408 423  
 L Y T P V I H L A Q F L T S A V  
 CTCTACACCCCGGTGATTCATCTGGCCAGTTCCTTACATCAGCTGTG

**94-5: GGTG** deleted and frameshift from P411  
 408 423  
 L Y T P F I W P S S L H Q L C \*  
 CTCTACACCCATTTCATCTGGCCAGTTCCTTACATCAGCTGTGTAA

>> Frameshift leads to a **premature stop** codon in exon 11

**Line 99-4: Exon 2 (CLN7 genomic DNA NG\_008657.1)**

**WT:**  
 .....exon.....v..intron..  
 12 20  
 L L G D T P G S R  
 CTCTTAGGCGACACACCTGGAGAGCAGGTGA

**99-4: AGCAGG** deleted  
 .....exon.....  
 12 19  
 L L G D T P G \*  
 CTCTTAGGCGACACACCTGGATGA

>> Deletion leads to a shift of a **stop codon** from intron to previous exon 2 or splicing is affected

a) Measurement of CLN7 mRNA expression in our CLN7-deficient HEK293T cell lines using quantitative PCR. In line 99-4 (middle bar) CLN7 mRNA could no longer be detected. In line 94-5 (right bar), approximately 30% CLN7 mRNA could still be detected compared to wild-type cells (left bar). b) Genomic DNA from both HEK293T knockout cell lines was isolated, amplified and sequenced. For line 94-5, we observed a deletion of 4 bases in exon 11, causing a frameshift and thus a premature stop codon at amino acid position 423. In line 99-4, a deletion of 6 bases occurs directly at the boundary between exon 2 and the following intron. Most likely, this causes a stop codon from the intron to enter exon 2, resulting in premature termination of the CLN7 protein. Alternatively, splicing could be affected.
